# Supplementary material
Source: publisher site journal article supplement (https://www.dovepress.com/article/443319)
Supplement: Supplementary file 1 [file get_supplementary_file.php]

## Supplemental Material

**Table S1 Trend test between LCR level and incidence of NOAF**

|                           | NOAF after PCI    |           |             |         |
|---------------------------|-------------------|-----------|-------------|---------|
|                           | Cases/Overall (%) | OR        | 95% CI      | P-value |
| <b>LCR median (range)</b> |                   |           |             |         |
| 0.045 (<0.137)            | 45/165 (27.3%)    | Reference |             |         |
| 0.264 (0.137-0.434)       | 24/166 (14.5%)    | 0.451     | 0.260-0.783 | 0.005   |
| 0.691 (0.434-1.207)       | 10/166 (6.0%)     | 0.171     | 0.083-0.353 | < 0.001 |
| 2.000 (> 1.207)           | 5/165 (3.0%)      | 0.083     | 0.032-0.216 | < 0.001 |
| <b>P for trend</b>        | < 0.001           |           |             |         |

**Abbreviations:** LCR, lymphocyte to C-reactive protein ratio; NOAF, new onset atrial fibrillation; PCI, percutaneous coronary intervention; OR, odds ratio; CI, confidence interval

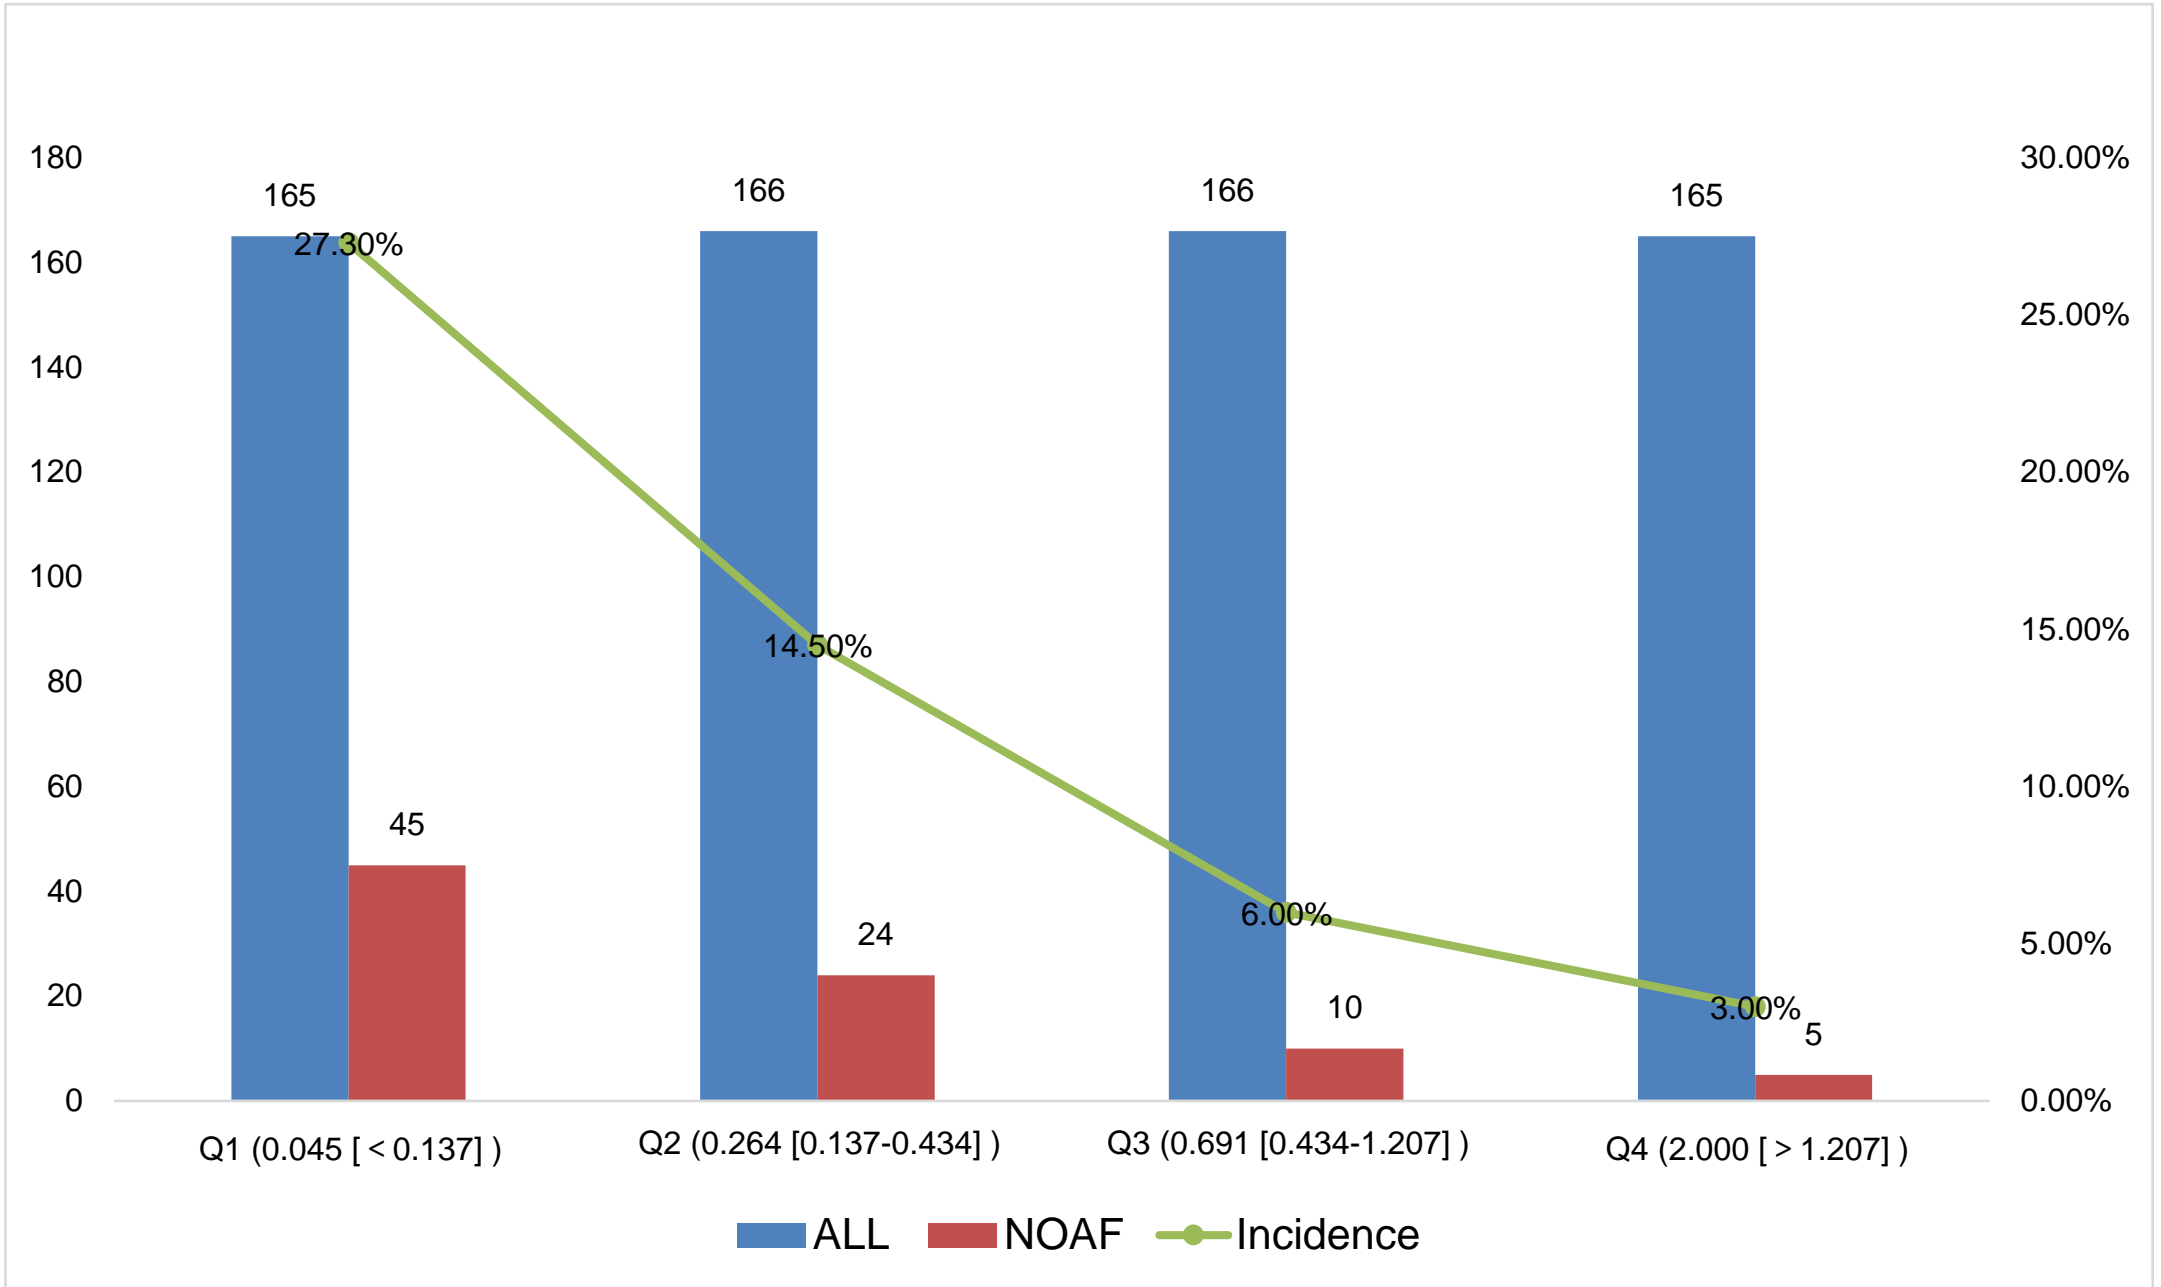

**Figure S1** Visualization graph of trend test. NOAF, new onset atrial fibrillation
